# Supplementary material for: Cardio-renal protective effect of the xanthine oxidase inhibitor febuxostat in the 5/6 nephrectomy model with hyperuricemia
Source: PubMed Central journal article supplement (PMC7283314; doi:10.1038/s41598-020-65706-6), 2020-06-09

# Supplemental Figure 1.

Full-length images of Western blot analysis.

Fig. 6

Nrf2

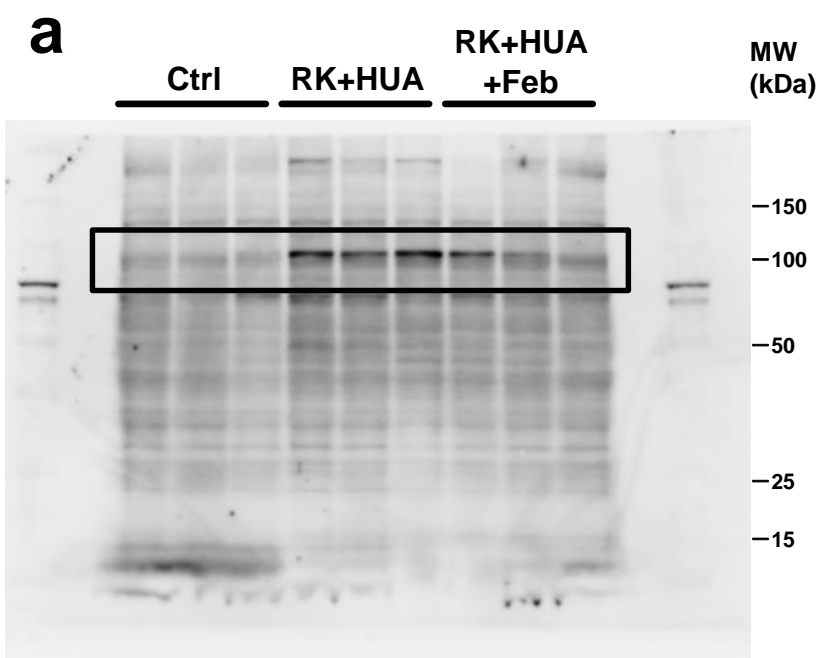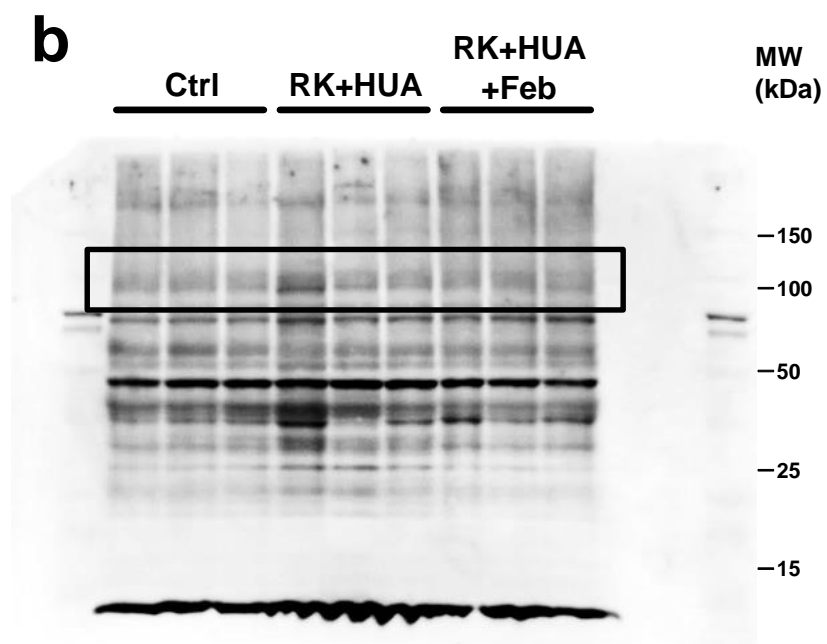

GAPDH

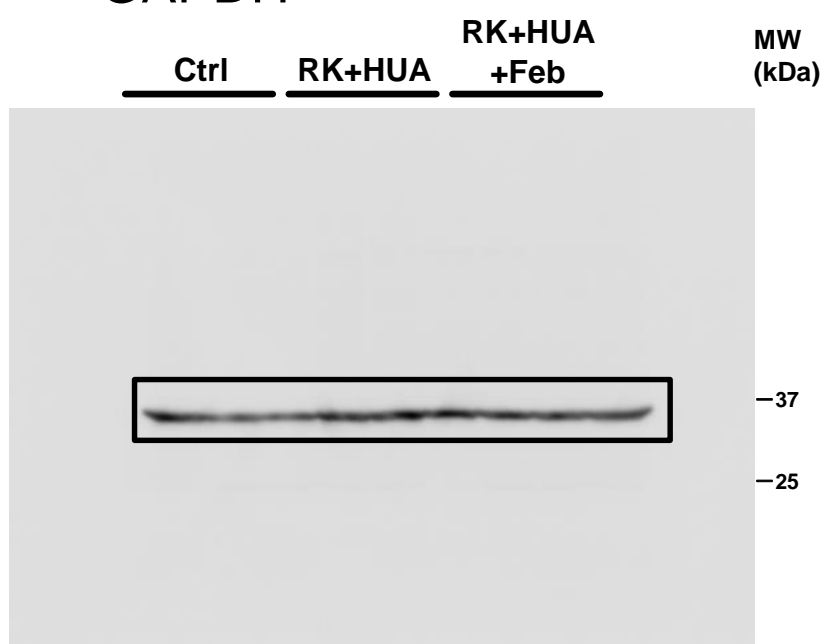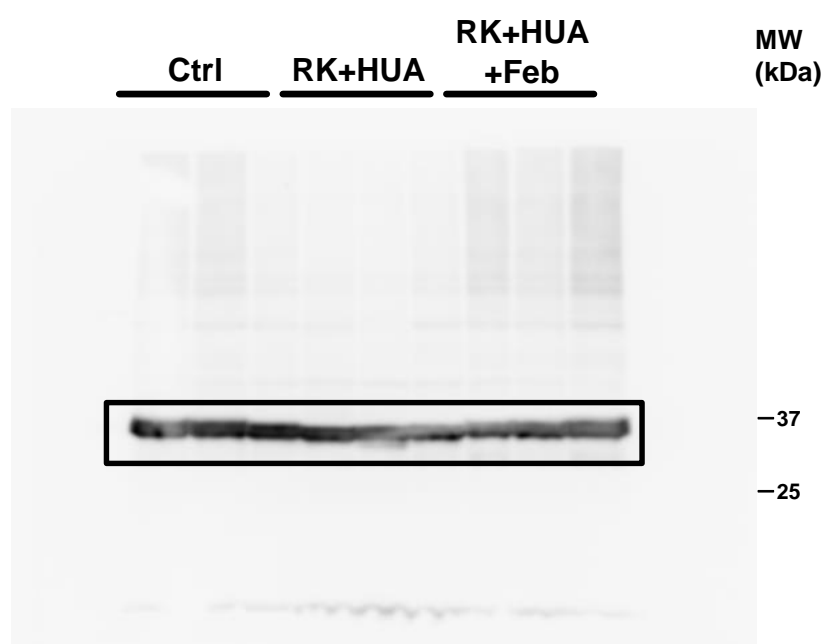

Fig. 6

HO-1

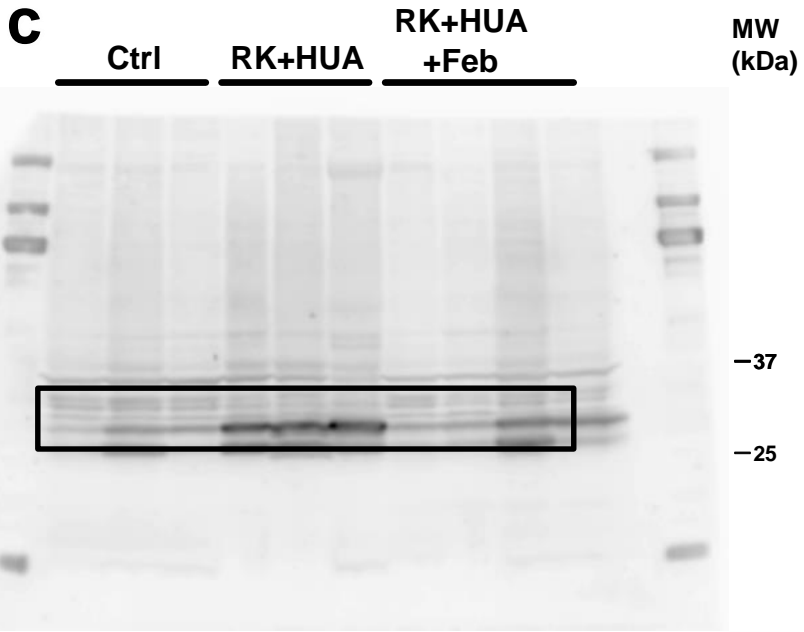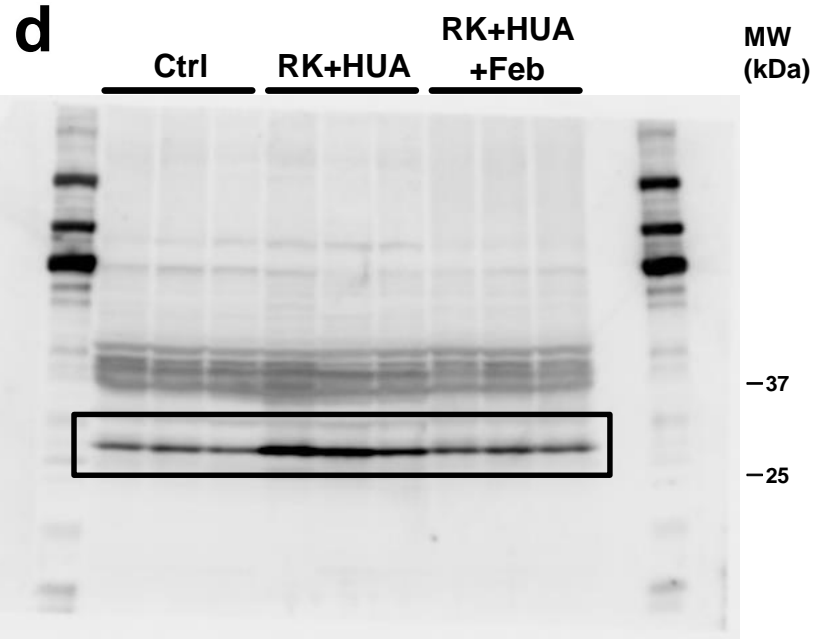

GAPDH

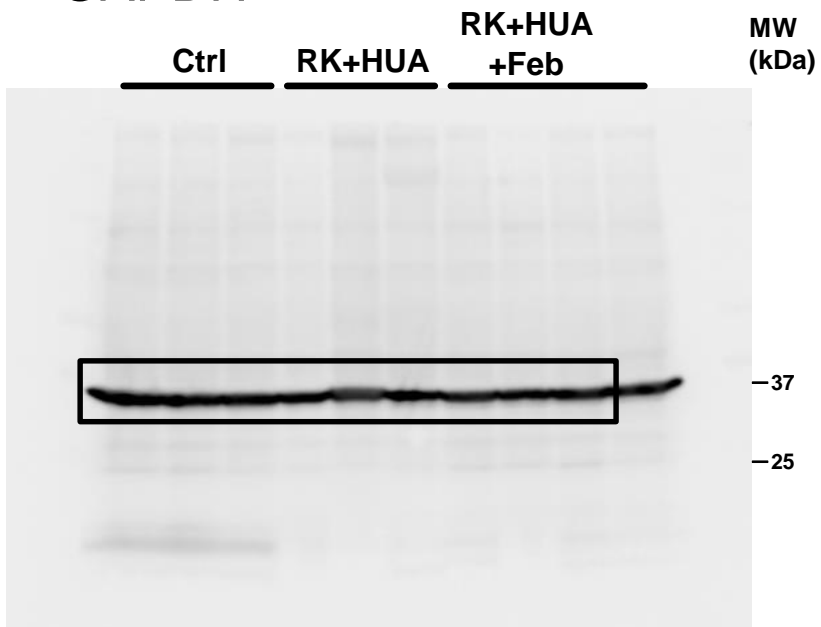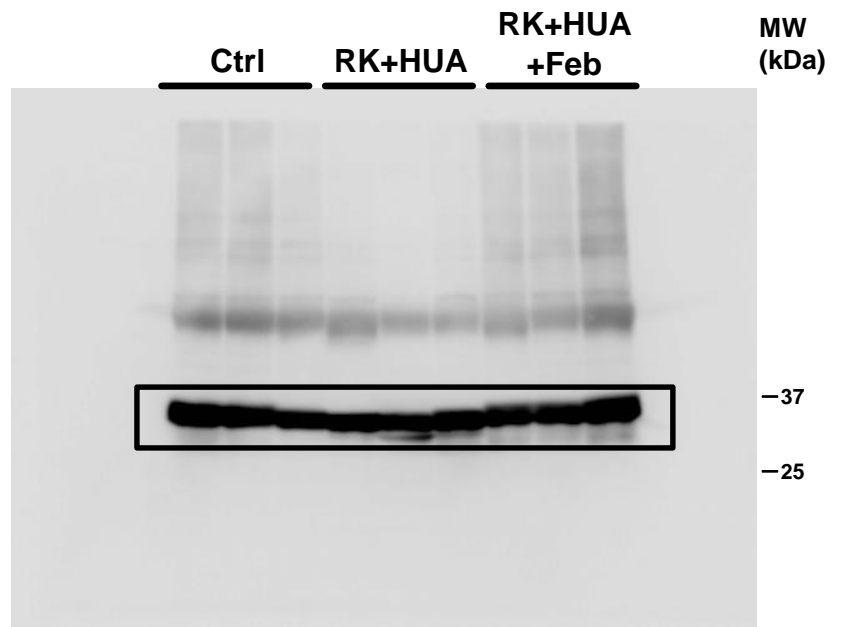

Supplement: 41598_2020_65706_MOESM1_ESM.pdf [file 41598_2020_65706_MOESM1_ESM.pdf]
